# Supplementary material for: α7 Nicotinic Acetylcholine Receptors May Improve Schwann Cell Regenerating Potential via Metabotropic Signaling Pathways
Source: MDPI journal article supplement (doi:10.3390/cells12111494), 2023-05-28
Supplement: s1 [file s1]

## Supplementary materials

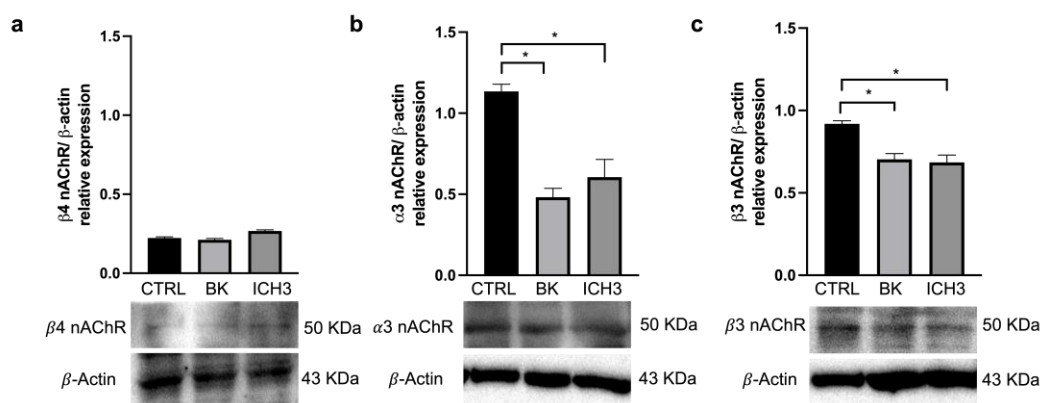

**Figure S1.** Expression levels of β4, α3, β3 nAChR subunits in SCs. Western blot analysis of (a) β4 nAChR, (b) α3 nAChR, (c) β3 nAChR protein expression in SCs after 24 h of treatment with 10 μM BK or 48 h of treatment with 10 μM ICH3 after 24 h of pretreatment with BK. SCs were pretreated with BK for 24 h before ICH3 treatment. β-Actin was used as internal reference protein. The graph shows the densitometric analysis of the bands of western blot analysis for α7 nAChR normalized with the bands of the β-Actin used as reference protein. The data are the average ± SEM of three independent experiments. T-test's student was used (\* $p < 0.05$ ).

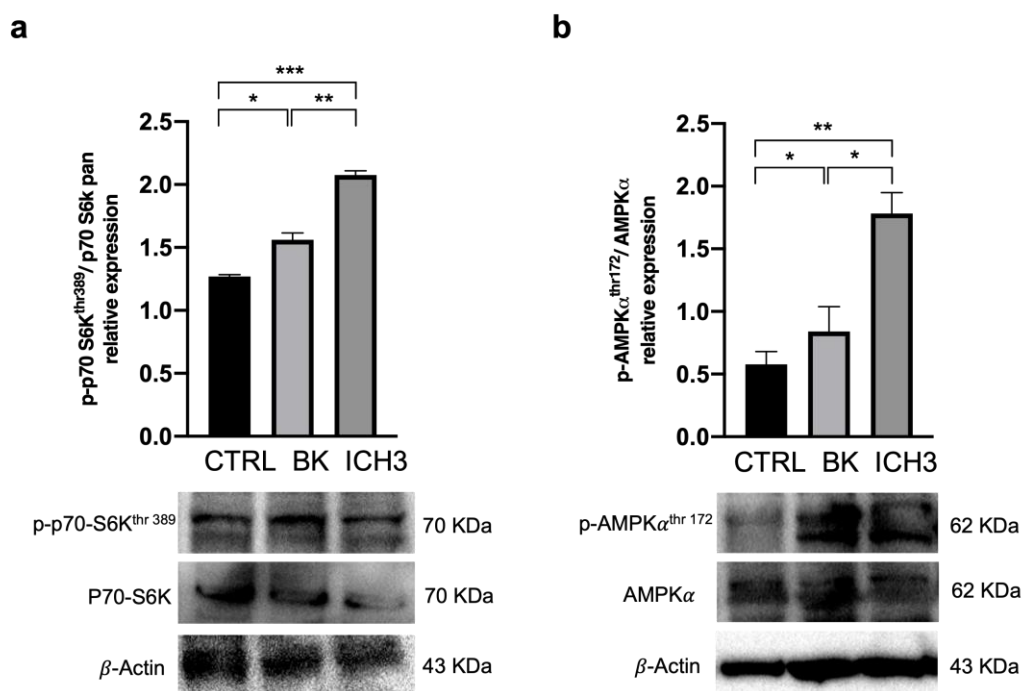

**Figure S2.** SCs were treated with 10 μM BK alone and with 10 μM ICH3 after BK pretreatment (a) Phospho-p70S6K<sup>Thr389</sup> expression. β-Actin was used as internal reference protein. The graph shows the densitometric analysis of the bands of western blot analysis for Phospho-p70S6K normalized with the bands of the non-phosphorylated p70S6K protein. (b) Phospho-AMPKα<sup>Thr172</sup> expression. β-Actin was used as internal reference protein. The graph shows the densitometric analysis of the bands of western blot analysis for Phospho-AMPKα normalized with the bands of the non-phosphorylated AMPKα protein. All data are the average ± SEM of three independent experiments. Student's t-test was used (\* $p < 0.05$ ; \*\* $p < 0.01$ ; \*\*\* $p < 0.001$ ).
